# Supplementary material for: Improving the nutritional value of Golden Rice through increased pro-vitamin A content
Source: Springer Nature journal article supplement (doi:10.1038/nbt1082), 2005-03-27
Supplement: 41587_2005_BFnbt1082_MOESM1_ESM.pdf [file 41587_2005_BFnbt1082_MOESM1_ESM.pdf]

**Supplementary Figure 1 Carotenoid Biosynthesis in plants**

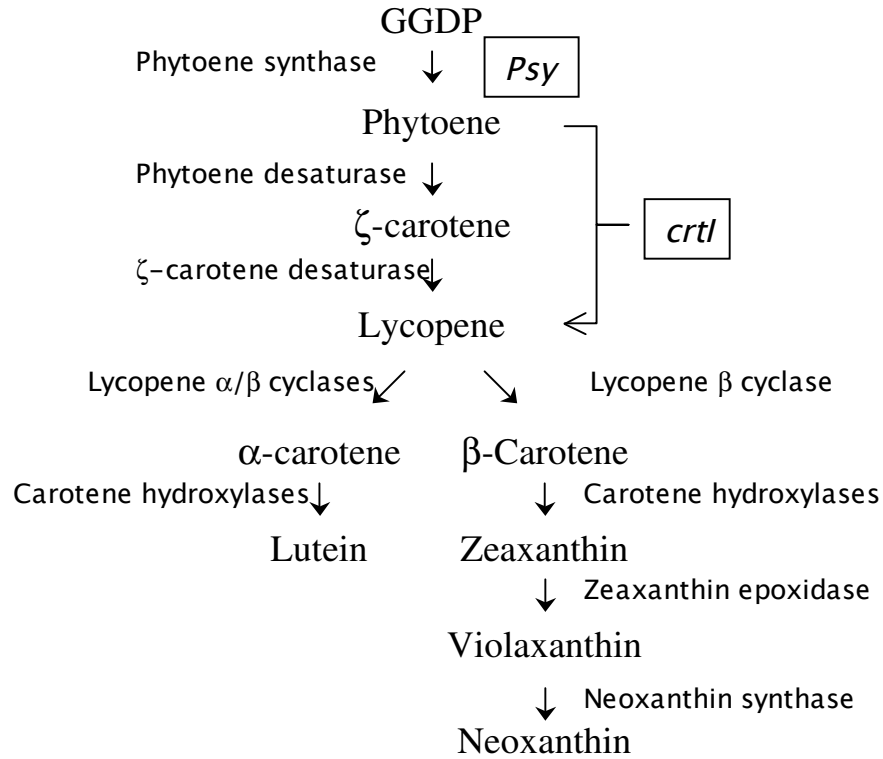

The isoprenoid precursor for carotenoid biosynthesis is geranyl geranyl diphosphate (GGDP). The transgenes present in Golden Rice are boxed. These encode the enzymes phytoene synthase (*Psy*) and the multifunctional carotene desaturase (*crtI*). The enzyme names of the plant biosynthetic pathway are shown in a simplified form. Carotenoids below  $\alpha/\beta$ -carotene are xanthophylls.
