# Supplementary material for: Improving the nutritional value of Golden Rice through increased pro-vitamin A content
Source: Springer Nature journal article supplement (doi:10.1038/nbt1082), 2005-03-27
Supplement: 41587_2005_BFnbt1082_MOESM3_ESM.pdf [file 41587_2005_BFnbt1082_MOESM3_ESM.pdf]

**Supplementary Table 1 Carotenoid composition of maize callus expressing a *Psy* transgene**

| <i>Psy</i> source   | Colored carotenoid composition, % of total <sup>a</sup> |                    |        |              |            |                    | phytoene (g/g) <sup>b</sup> |
|---------------------|---------------------------------------------------------|--------------------|--------|--------------|------------|--------------------|-----------------------------|
|                     | $\beta$ -carotene                                       | $\alpha$ -carotene | lutein | violaxanthin | neoxanthin | minor xanthophylls |                             |
| Maize               | 51.3                                                    | 22.5               | 19.0   | 3.9          | 0.7        | 2.6                | 96                          |
| Rice                | 35.5                                                    | 11.0               | 33.1   | 12.9         | n.d.       | 7.4                | 59                          |
| Tomato              | 15.8                                                    | 5.4                | 50.1   | 21.6         | 6.9        | 0.3                | 2.5                         |
| Pepper              | 10.1                                                    | 3.3                | 41.9   | 43.3         | 1.4        | n.d.               | 1.6                         |
| Carrot              | 8.6                                                     | 2.5                | 51.0   | 25.7         | 11.9       | 0.2                | 3.7                         |
| <i>Arabidopsis</i>  | 21.1                                                    | 10.5               | 44.1   | 20.4         | 2.4        | 1.6                | 0.4                         |
| Daffodil            | 15.9                                                    | 4.7                | 49.5   | 21.2         | 6.5        | 2.1                | 0.1                         |
| None (empty vector) | 5.4                                                     | 1.4                | 47.0   | 36.9         | 7.4        | 1.9                | 1.0                         |

<sup>a</sup> Colored carotenoid values are the average for the five calli containing the highest carotenoid content from each population (n.d. is not detected).

<sup>b</sup> For phytoene, the content of the 75<sup>th</sup> percentile sample is shown.
